# Supplementary material
Source: Research Square preprint supplement (doi:10.21203/rs.3.rs-9701919/v1)
Supplement: Supplementary file 1 [file 4108d00032142b734ade6e29.docx]

**Appendix Table A. Comprehensive Descriptive Statistics: Full Cohort and Per-Drug Breakdown**

*This table presents complete descriptive statistics across all major variables for the full cohort and stratified by stimulant agent. Values are mean ± SD or n (%) unless otherwise stated. Statistical significance markers: ns = not significant; * p<0.05; ** p<0.01; *** p<0.001.*

| **Variable / Characteristic** | **All Procedures (N=1,542)** | **Arginine (N=187)** | **Clonidine (N=757)** | **Glucagon (N=566)** | **Levodopa (N=32)** |
| --- | --- | --- | --- | --- | --- |
| **DEMOGRAPHICS** |  |  |  |  |  |
| Male / Female (n, %) | 832/710 (53.5/46.5%) | 105/82 (56.1/43.9%) | 406/351 (53.6/46.4%) | 303/263 (53.5/46.5%) | 18/14 (56.2/43.8%) |
| Age: Mean ± SD (years) | 10.20 ± 4.07 | 9.83 ± 3.79 | 10.34 ± 3.88 | 10.09 ± 4.17 | 11.44 ± 6.53 |
| Age: Median [IQR] (years) | 11.0 [8.0–13.0] | 10.0 [7.0–13.0] | 11.0 [8.0–13.0] | 11.0 [7.0–13.0] | 10.0 [8.0–13.25] |
| Age range (Min – Max) | 1 – 47 | 2 – 17 | 1 – 47 | 2 – 47 | 4 – 43 |
| **ANTHROPOMETRICS (patients with BMI data, N=681)** | **N=681** | **N=16** | **N=681** | **N=28** | **N=5** |
| Height: Mean ± SD (cm) | 127.2 ± 18.0 | 126.8 ± 11.6 | 127.2 ± 18.0 | 128.8 ± 19.0 | 126.0 ± 11.4 |
| Weight: Mean ± SD (kg) | 29.0 ± 12.3 | 28.6 ± 8.1 | 29.0 ± 12.3 | 30.9 ± 13.5 | 25.2 ± 5.3 |
| BMI: Mean ± SD (kg/m²) | 17.23 ± 4.31 | 17.58 ± 3.30 | 17.23 ± 4.31 | 17.67 ± 3.78 | 15.72 ± 1.07 |
| BMI: Median [IQR] (kg/m²) | 16.3 [14.7–18.7] | 17.5 [15.6–18.6] | 16.3 [14.7–18.7] | 16.8 [15.1–18.7] | 16.0 [14.8–16.6] |
| BMI range (Min – Max) | 11.7–38.4 | 13.0 – 27.8 | 11.7–38.4 | 13.0 – 26.0 | 14.4 – 16.8 |
| **PEAK GH RESPONSE (µg/L)** |  |  |  |  |  |
| Mean ± SD | 10.38 ± 7.87 | 6.21 ± 5.16 | 10.82 ± 8.42 | 11.49 ± 7.46 | 4.76 ± 3.97 |
| 95% CI of mean | 9.99 – 10.77 | 5.46 – 6.95 | 10.22 – 11.42 | 10.87 – 12.10 | 3.33 – 6.20 |
| Median [IQR] | 9.04 [5.20–13.99] | 5.10 [2.53–8.30] | 9.49 [5.71–14.29] | 10.11 [6.27–14.90] | 4.77 [0.84–7.21] |
| Range (Min – Max) | 0.01 – 126.6 | 0.05 – 30.8 | 0.01 – 126.6 | 0.09 – 45.0 | 0.01 – 13.2 |
| P5 – P95 (µg/L) | 1.20 – 23.63 | 0.70 – 14.46 | 1.70 – 23.06 | 1.45 – 24.78 | 0.05 – 12.10 |
| **RESPONSE CATEGORIES (per procedure)** |  |  |  |  |  |
| Normal (≥10 µg/L) — n (%) | **671 (43.5%)** | 35 (18.7%) | 349 (46.1%) | 284 (50.2%) | 3 (9.4%) |
| Partial (5–10 µg/L) — n (%) | 507 (32.9%) | 64 (34.2%) | 244 (32.2%) | 191 (33.7%) | 11 (34.4%) |
| Insufficient (<5 µg/L) — n (%) | 364 (23.6%) | 88 (47.1%) | 164 (21.7%) | 91 (16.1%) | 18 (56.3%) |
| **TEMPORAL RESPONSE (minutes)** |  |  |  |  |  |
| Peak time: Mean ± SD | — | 44 ± 32 | 66 ± 23 | 123 ± 35 | 50 ± 16 |
| Peak time: Median [IQR] | — | 30 [30–60] | 60 [60–90] | 120 [120–150] | 60 [30–60] |
| GH ≥5 achieved — n (%) | — | 101 (54.0%) | 595 (78.6%) | 476 (84.1%) | 15 (46.9%) |
| Time to GH≥5: Mean ± SD | — | 38 ± 29 | 52 ± 22 | 102 ± 44 | 42 ± 15 |
| GH ≥10 achieved — n (%) | — | 35 (18.7%) | 349 (46.1%) | 284 (50.2%) | 3 (9.4%) |
| Time to GH≥10: Mean ± SD | — | 36 ± 30 | 58 ± 19 | 117 ± 35 | 40 ± 17 |

Abbreviations: SD = standard deviation; CI = confidence interval; IQR = interquartile range; MWU = Mann–Whitney U test; KW = Kruskal–Wallis test; UW = underweight; ref = reference category. BMI data available for N=681 (45.8% of full cohort); drug-level BMI subsets: clonidine N=681, glucagon N=28, arginine N=16, levodopa N=5.
